# Supplementary material for: The novel complex combination of alum, CpG ODN and HH2 as adjuvant in cancer vaccine effectively suppresses tumor growth in vivo
Source: PubMed Central journal article supplement (PMC5542240; doi:10.18632/oncotarget.17504), 2017-04-28
Supplement: oncotarget-08-45951-s001.pdf [file oncotarget-08-45951-s001.pdf]

## The novel complex combination of alum, CpG ODN and HH2 as adjuvant in cancer vaccine effectively suppresses tumor growth *in vivo*

### Supplementary Materials

#### MATERIALS AND METHODS

##### Preparation of NY-ESO-1 protein and vaccines

NY-ESO-1 protein (18 kDa) was prepared according to the protocols from a previous study [16]. Finally, the quality of NY-ESO-1 protein was detected by SDS-PAGE and Western blotting (Supplementary Figure 4).

To prepare the vaccines, 20  $\mu$ g CpG 1826 (Thermo Fisher Scientific, San Jose, CA, USA) was incubated with 40  $\mu$ g HH2 (Ketai Biotechnology Company, Shanghai,

China) to form stable CpG-HH2 complex and then mixed with 125  $\mu$ g alum (Brenntag Biosector, Frederikssund, Denmark) at 37°C for 10 min, followed by the addition of 5  $\mu$ g recombinant NY-ESO-1 protein. All vaccine formulations were in a total volume of 100  $\mu$ L with phosphate-buffered saline (PBS, pH = 7.4). Mice in each tumor model reported here were divided into five groups. The clear representation of vaccine formulations in each group was shown in Supplementary Table 1.

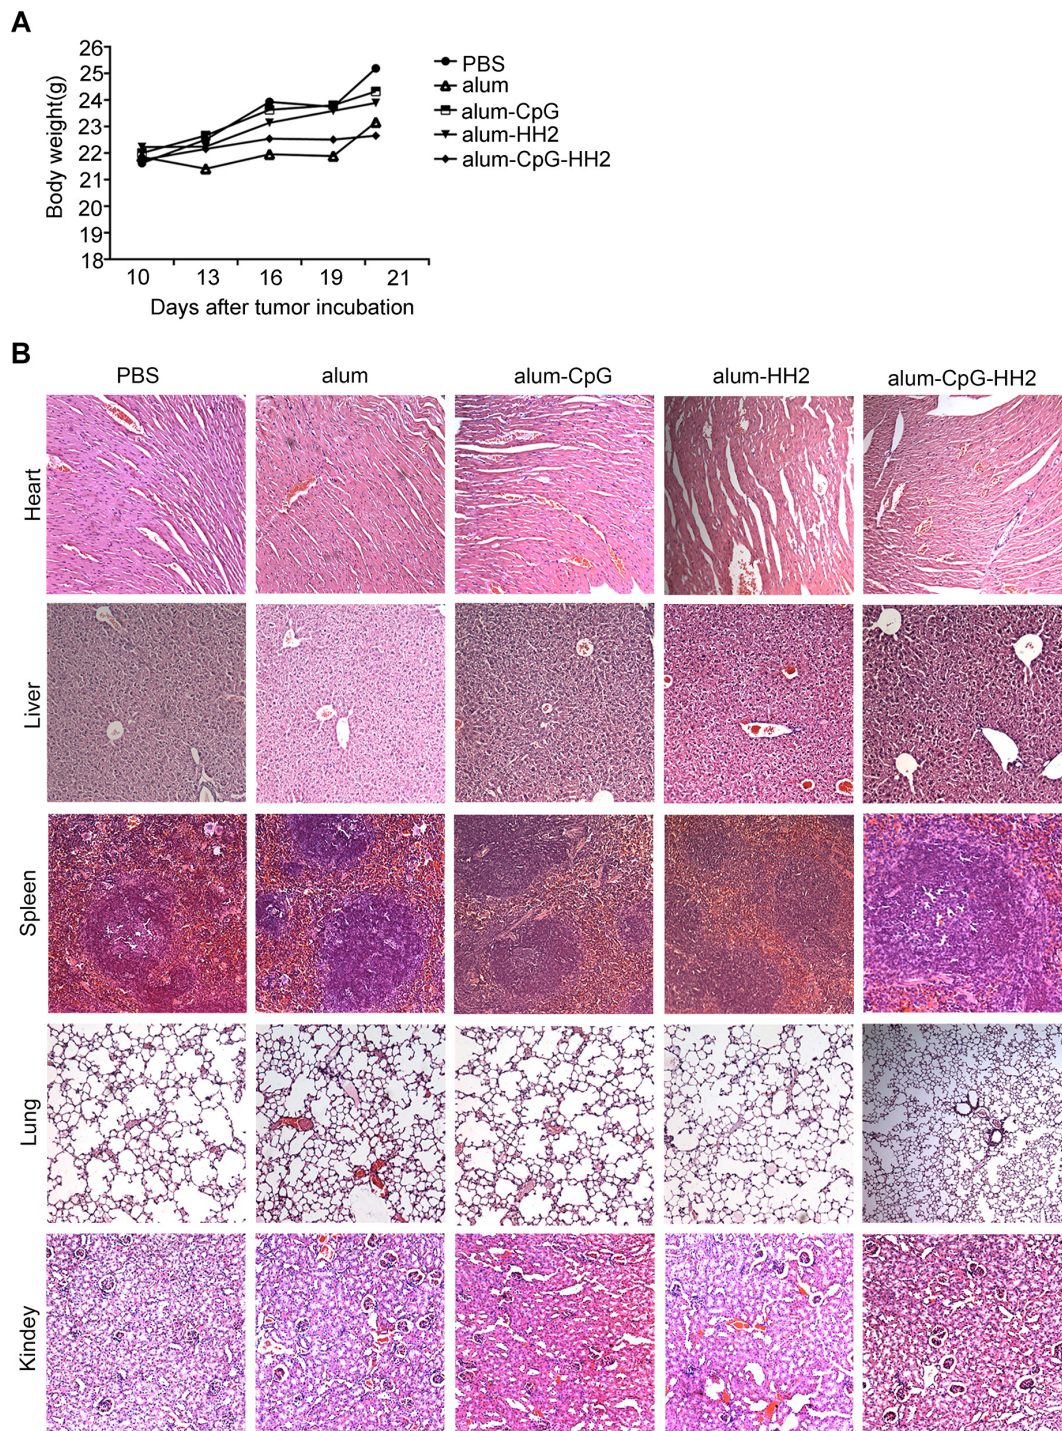

**Supplementary Figure 1: Body weight and histological analyses of all major organs.** (A) Body weight was determined every 3 days during the delivery period. (B) Histological analyses of heart, liver, spleen and kidney were performed by H&E staining (200×magnification).

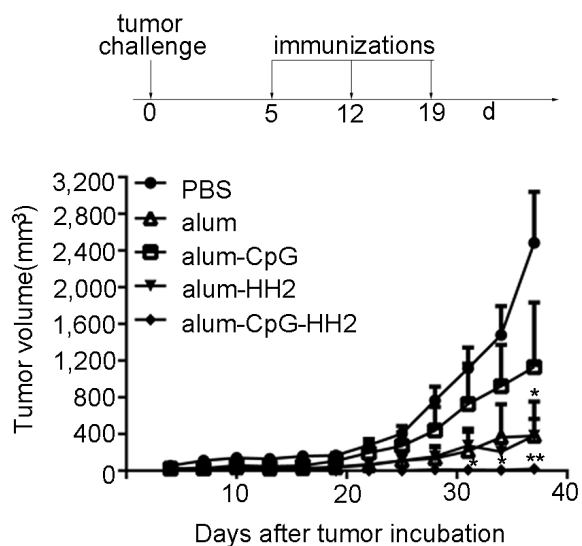

**Supplementary Figure 2: Alum-CpG-HH2-NY vaccine inhibits tumor growth in therapeutic hepatoma models.** Mice were inoculated with  $1 \times 10^7$  NY-ESO-1<sup>+</sup> Hepa1-6 cells and treated with indicated vaccines on days 5, 12 and 19. Error bars represent mean + SEM. \* $p < 0.05$ , \*\* $p < 0.01$ .

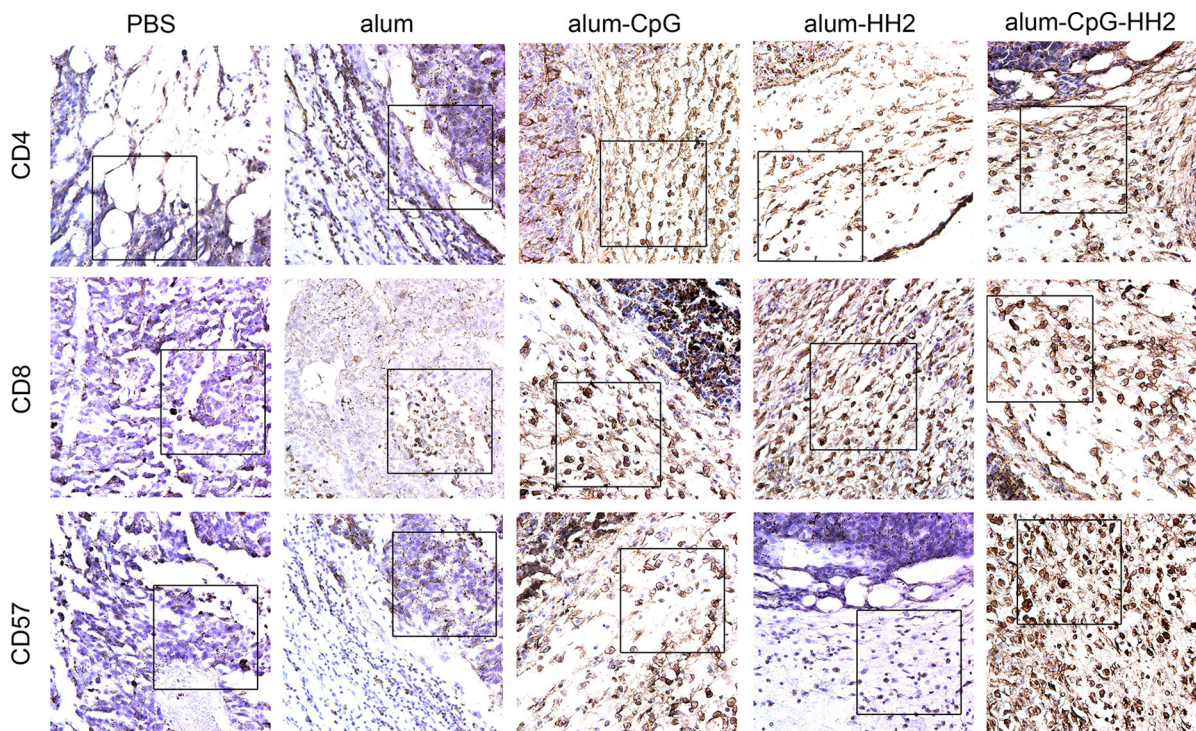

**Supplementary Figure 3: The representative IHC staining for CD4<sup>+</sup>, CD8<sup>+</sup>, and CD57<sup>+</sup> lymphocytes in tumor tissue from each group.** A square portion of the whole image was selected and enlarged for a better observing of the positive lymphocytes.

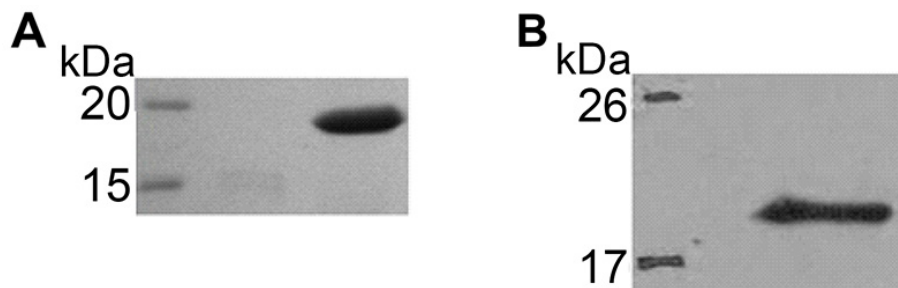

**Supplementary Figure 4: The identification of NY-ESO-1 protein.** (A) SDS-PAGE analysis of purified NY-ESO-1 protein. (B) Western blot analysis of purified NY-ESO-1 protein, showing that NY-ESO-1 specifically binds to anti-human NY-ESO-1 antibody.

**Supplementary Table 1: The formulations of vaccines used in animal experiments**

| Vaccines or groups | Vaccine formulations              |       |       |        |
|--------------------|-----------------------------------|-------|-------|--------|
|                    | Recombinant NY-ESO-1 protein (NY) | CpG   | HH2   | alum   |
| alum-NY            | 5 µg                              | /     | /     | 125 µg |
| alum-CpG-NY        | 5 µg                              | 20 µg | /     | 125 µg |
| alum-HH2-NY        | 5 µg                              | /     | 40 µg | 125 µg |
| alum-CpG-HH2-NY    | 5 µg                              | 20 µg | 40 µg | 125 µg |

Note: All vaccines were prepared to a total volume of 100 µL with PBS (pH = 7.4).
